# Supplementary material for: Snail Overexpression Alters the microRNA Content of Extracellular Vesicles Released from HT29 Colorectal Cancer Cells and Activates Pro-Inflammatory State In Vivo
Source: MDPI journal article supplement (doi:10.3390/cancers13020172), 2021-01-06

CD63 in HT29-pcDNA (non-reducing conditions, ~55kDa)

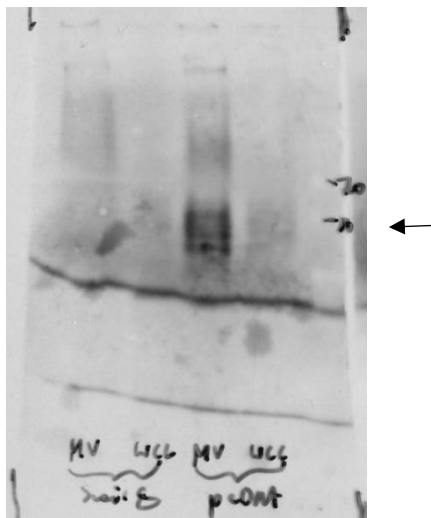

CD63 in HT29-Snail 17(non-reducing conditions, ~55kDa)

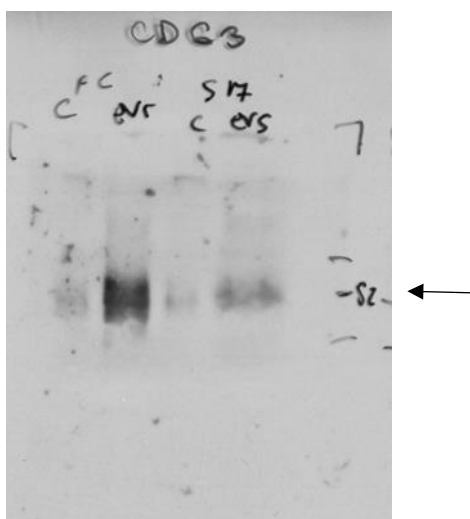

CD9 in HT29-pcDNA (25kDa)

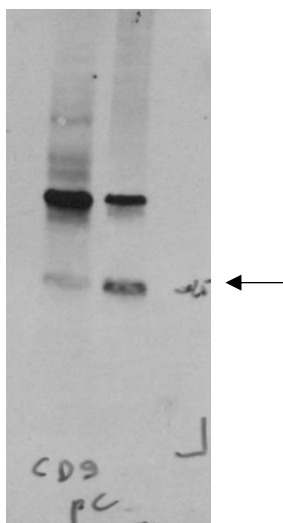

CD9 in HT29-Snail 17 (25kDa)

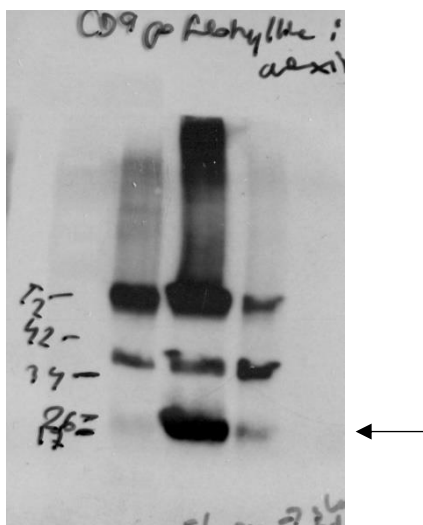

Flotillin-1 in HT29-pcDNA (49kDa)

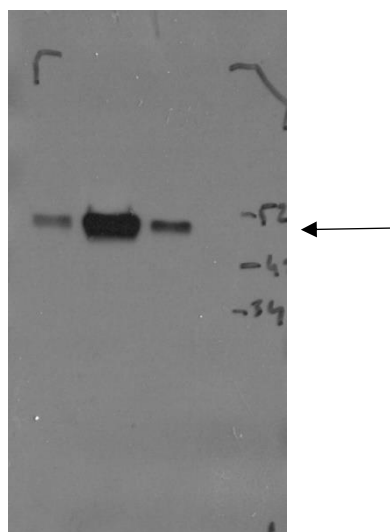

Flotillin-1 in HT29-Snail 17 (49kDa)

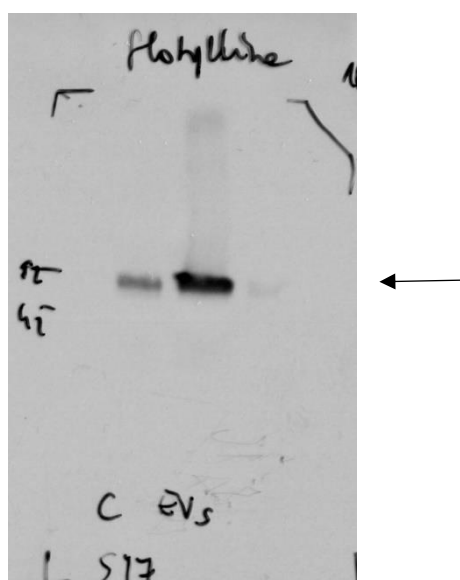

HSP70 in HT29-pcDNA and HT29-Snail 17

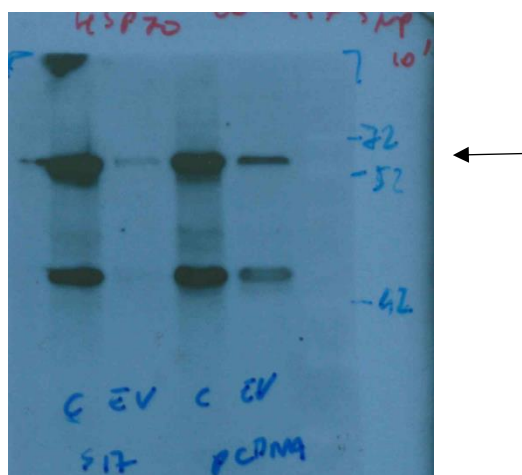

Annexin V in HT29-pcDNA (34kDa)

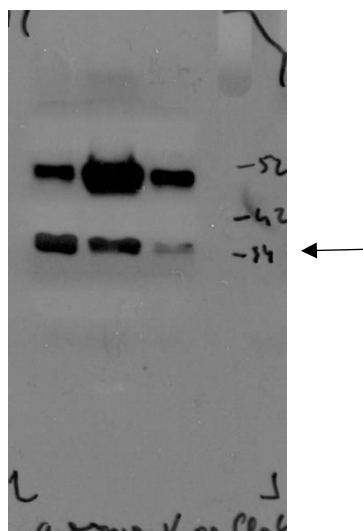

Annexin V in HT29-Snail 17 (34kDa)

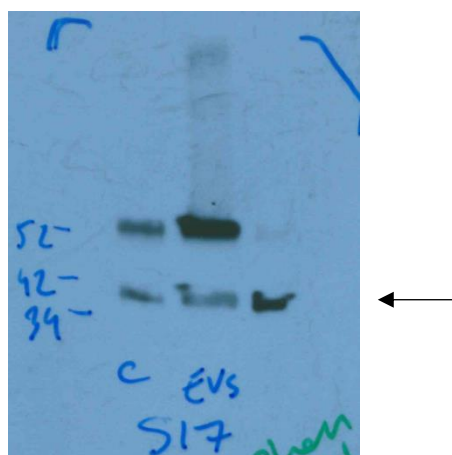

Cytochrome c in HT29-pcDNA and HT29-Snail 17 (14kDa)

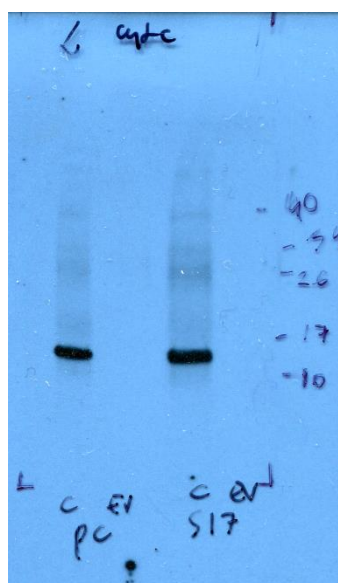

GM130 in HT29-pcDNA and HT29-Snail 17(130kDa)

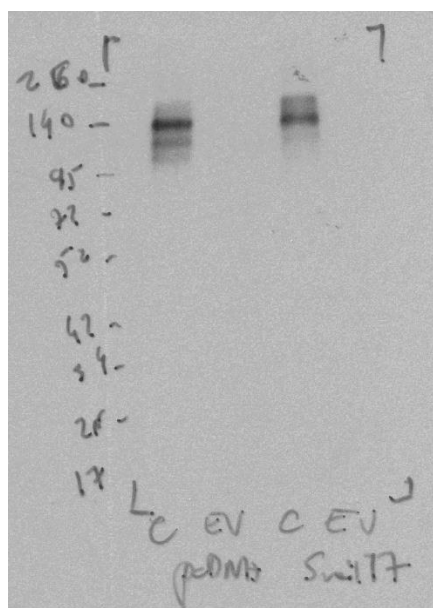

Snail in HT29-pcDNA and HT29-Snail clones (30 kDa)

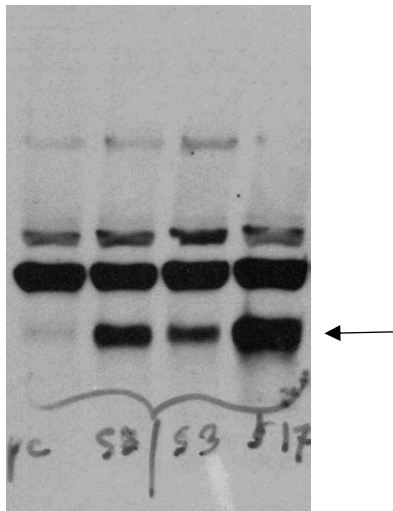

Supplement: s1 [file s1]
