# Supplementary material for: Snail Overexpression Alters the microRNA Content of Extracellular Vesicles Released from HT29 Colorectal Cancer Cells and Activates Pro-Inflammatory State In Vivo
Source: MDPI journal article supplement (doi:10.3390/cancers13020172), 2021-01-06
Supplement: s1 [file s1]

# Supplementary Materials: Snail overexpression alters the microRNA content of extracellular vesicles released from HT29 colorectal cancer cells and activates pro-inflammatory state in vivo

Izabela Papiewska-Pająk, Patrycja Przygodzka<sup>1</sup> Damian Krzyżanowski, Kamila Soboska, Izabela Szulc-Kiełbik, Olga Stasikowska-Kanicka, Joanna Boncela, Małgorzata Wągrowa-Danilewicz, M. Anna Kowalska

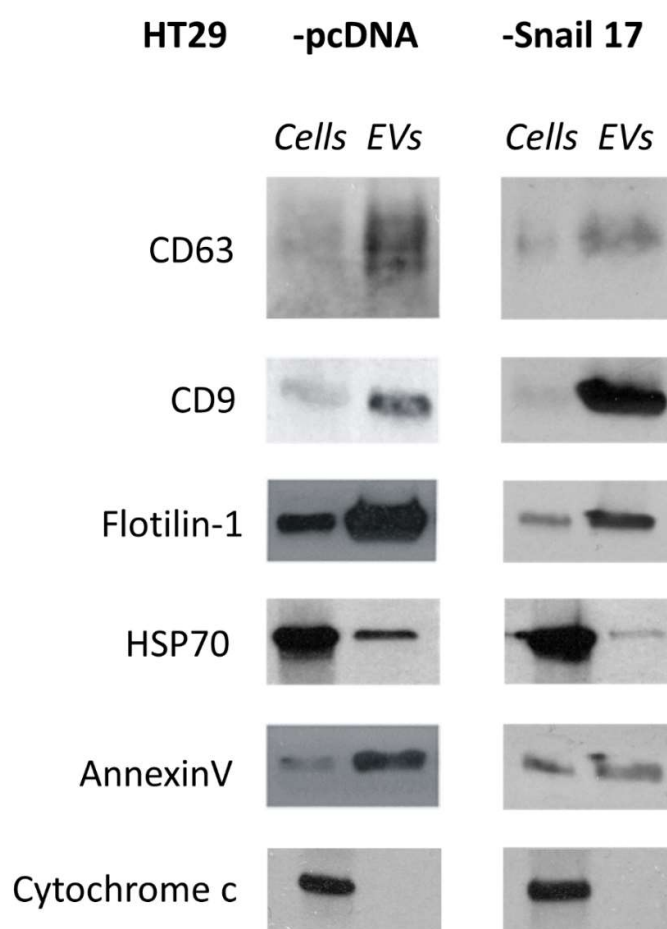

**Figure S1.** Western blot of EVs markers. EVs released from HT29-pcDNA and HT29-Snail 17 cells as compared to lysates of cells of origin. Proteins from cells and EVs were extracted with RIPA buffer or non-reducing buffer for CD63 with the Halt protease inhibitor cocktail (Thermo Scientific, Waltham, MA, USA) [30]. The primary (rabbit) and secondary (HRP-conjugated) antibodies for EVs markers were from Cell Signaling Technology Inc., and mouse anti-CD63 from Abcam (Cambridge, UK). Enhanced chemiluminescence kit was from Thermo Fisher Scientific and Kodak BioMax Light Film from Eastman Kodak.

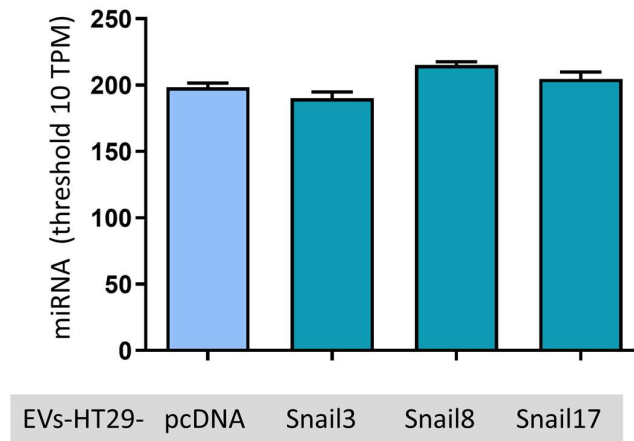

**Figure S2.** Global efficiency of miRNA processing. Number of identified known microRNAs with number of counts (>10TPM per sample) in HT29-pcDNA-EVs and HT29-Snail-EVs. Normalization procedure with TPM (Tags Per Million) was applied in Next Generation Sequencing (NGS) analysis. The number of reads that map to a particular RNA species is divided by the total number of mapped reads in the sample and subsequently multiplied by ten millions. That corrects for the sequencing depth and provides a very transparent measure of quantity for each RNA species. Snail upregulation in HT29 cells has no effect on the global efficiency of miRNA processing.

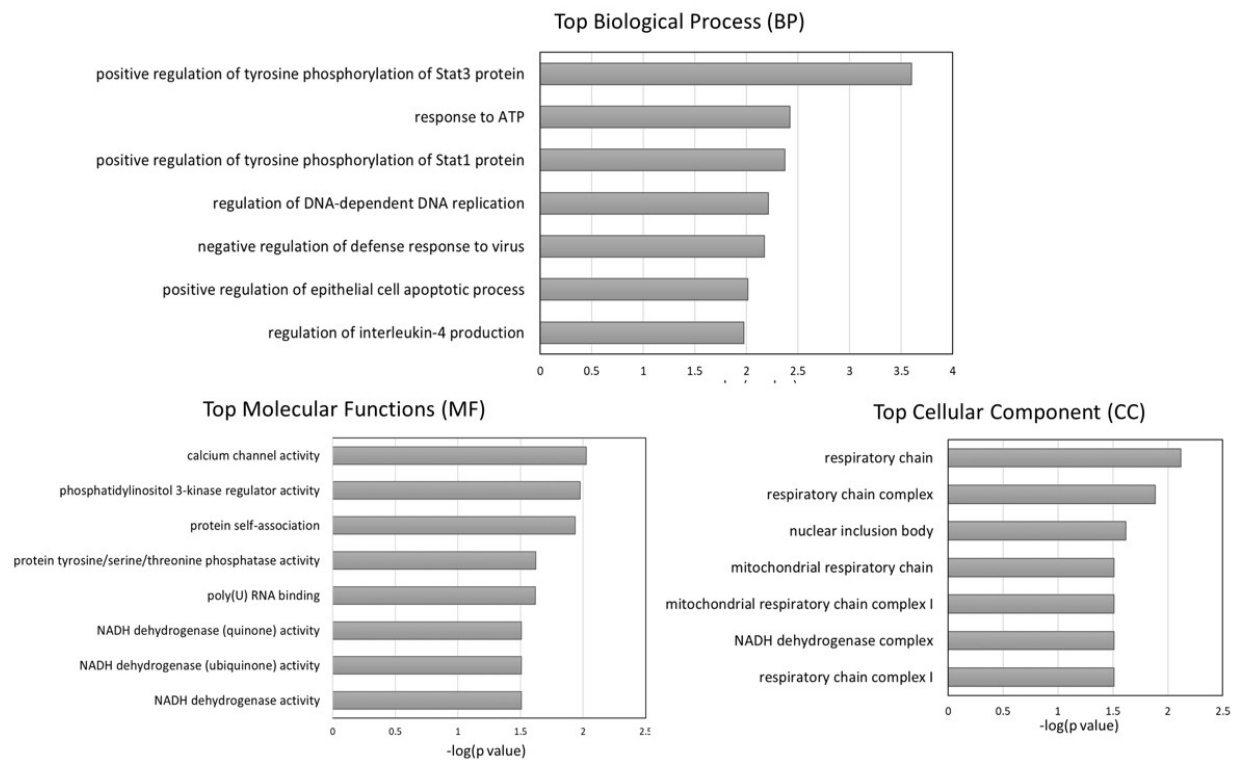

**Figure S3.** Gene Ontology Enrichment Analysis. The most significant GO terms for the microRNAs found to be differentially expressed between EVs released from HT29-Snail and HT29-pcDNA and their corresponding annotations for Biological Process, Molecular Function and Cellular Component.  $p$ -value < 0.05.

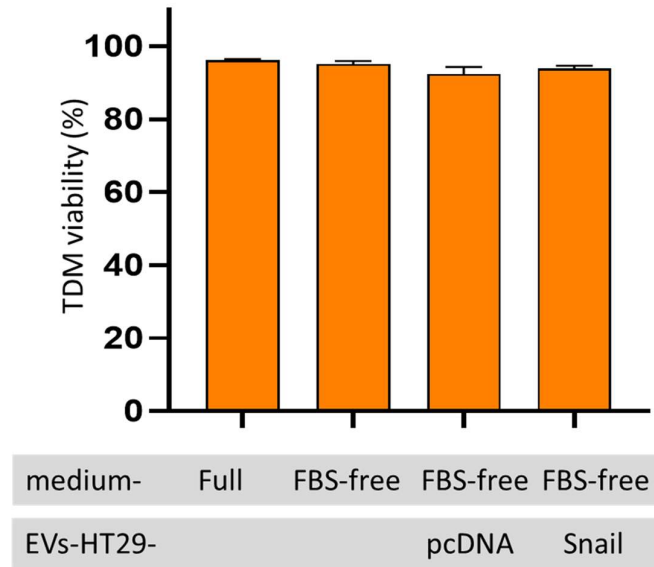

**Figure S4.** Cell viability assay. PI incorporation was analysed in THP-1-derived macrophages (TDM) incubated for 24 h with EVs according to the manufacturer's protocol using Becton Dickinson LSR II flow cytometer with BD FACS Diva software.

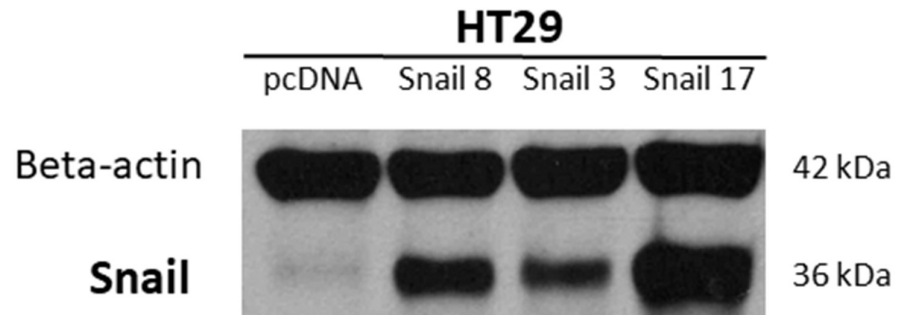

**Figure S5.** Snail transcription factor expression in the HT29 clones. After HT29 stable clone generation Snail expression was verified through Western blot analysis showing moderate (clone 3) and high (clone 8 and 17) Snail overexpression level. Proteins from cells were extracted with NP-40 lysis buffer with the Halt protease inhibitor cocktail (Thermo Scientific, Waltham, MA, USA). The equal amount of protein extracts (concentration measured BCA method (Pierce/Thermo Scientific, Waltham, MA, USA)) was subjected to SDS-PAGE analysis, transferred onto PVDF membranes (BioRad, Hercules, CA, USA) and blotted with mouse anti-Snail antibody (Cell Signaling Tech, Danvers, MA, USA). The control antibody, rabbit anti- $\beta$ -actin was obtained from Abcam (Cambridge, UK). Secondary HRP-conjugated antibody was from Santa Cruz Biotechnology, Dallas, TX, USA, enhanced chemiluminescence kit from Thermo Scientific, Waltham, MA, USA, and Kodak BioMax Light Film from Eastman Kodak, Rochester, NY, USA.

**Table S1.** Clone-specific miRNA evaluated during analysis of differentially expressed extracellular vesicles miRNA (fold change  $\leq -2.0$  for down-regulation and  $\geq 2.0$  for up-regulation) between each clone overexpressing Snail and control clone. miRs marked in red are discussed in the text.

| EVs-Snail 3-Specific miRNA              | EVs-Snail 8-Specific miRNA | EVs-Snail 17-Specific miRNA |
|-----------------------------------------|----------------------------|-----------------------------|
| Down-regulated, Fold change $\leq -2.0$ |                            |                             |
| hsa-miR-146a-5p                         | hsa-miR-455-3p             | hsa-miR-1266-5p             |
| hsa-miR-340-5p                          | hsa-miR-455-5p             | hsa-miR-150-5p              |
| hsa-miR-651-5p                          |                            | hsa-miR-203a                |
|                                         |                            | hsa-miR-203b-3p             |
|                                         |                            | hsa-miR-338-3p              |

|                                      |                 |                                                                                 |
|--------------------------------------|-----------------|---------------------------------------------------------------------------------|
|                                      |                 | hsa-miR-378a-3p<br>hsa-miR-378c<br>hsa-miR-378d<br>hsa-miR-378i<br>hsa-miR-549a |
| Up-regulated, Fold change $\geq 2.0$ |                 |                                                                                 |
| hsa-miR-1278                         | hsa-miR-1323    | hsa-miR-126-3p                                                                  |
| hsa-miR-27a-5p                       | hsa-miR-146a-5p | hsa-miR-149-5p                                                                  |
| hsa-miR-301a-5p                      | hsa-miR-372-3p  | hsa-miR-152-3p                                                                  |
| hsa-miR-3065-5p                      | hsa-miR-512-3p  | hsa-miR-181d-5p                                                                 |
| hsa-miR-338-5p                       | hsa-miR-516b-5p | hsa-miR-193a-5p                                                                 |
| hsa-miR-99b-3p                       | hsa-miR-584-5p  | hsa-miR-193b-3p                                                                 |
| hsa-miR-99b-5p                       | hsa-miR-6716-3p | hsa-miR-197-3p                                                                  |
|                                      | hsa-miR-874-3p  | hsa-miR-221-5p                                                                  |
|                                      |                 | hsa-miR-450b-5p                                                                 |
|                                      |                 | hsa-miR-483-5p                                                                  |
|                                      |                 | hsa-miR-582-5p                                                                  |
|                                      |                 | hsa-miR-590-3p                                                                  |
|                                      |                 | hsa-miR-934                                                                     |

**Table S2.** Differentially expressed miRNA evaluated during analysis of extracellular vesicles miRNA between each clone overexpressing Snail and control clone. miRs marked in red are discussed in the text.

| EVs-Snail 3-Specific miRNA                        | EVs-Snail 8-Specific miRNA | EVs-Snail 17-Specific miRNA |
|---------------------------------------------------|----------------------------|-----------------------------|
| Down-regulated, Fold change between -2.0 and -1.5 |                            |                             |
| hsa-miR-192-5p                                    | hsa-miR-141-3p             | hsa-miR-1303                |
| hsa-miR-194-5p                                    | hsa-miR-378c               | hsa-miR-139-5p              |
| hsa-miR-203b-3p                                   | hsa-miR-378d               | hsa-miR-194-3p              |
| hsa-miR-215-5p                                    |                            |                             |
| hsa-miR-340-3p                                    |                            |                             |
| hsa-miR-148a-3p                                   |                            |                             |
| hsa-miR-200a-3p                                   |                            |                             |
| hsa-miR-34a-5p                                    |                            | hsa-miR-34a-5p              |
| Up-regulated, Fold change between 1.5 and 2.0     |                            |                             |
| hsa-let-7e-3p                                     | hsa-miR-149-5p             | hsa-miR-222-3p              |
| hsa-miR-125a-3p                                   | hsa-miR-193b-3p            | hsa-miR-32-5p               |
| hsa-miR-1304-3p                                   | hsa-miR-335-3p             | hsa-miR-584-5p              |
| hsa-miR-330-3p                                    | hsa-miR-934                | hsa-miR-874-3p              |
| hsa-miR-3613-5p                                   | hsa-miR-99b-3p             |                             |
| hsa-miR-3615                                      | hsa-miR-99b-5p             |                             |
| hsa-miR-548o-3p                                   |                            |                             |
| hsa-miR-615-3p                                    |                            |                             |
| hsa-miR-641                                       |                            |                             |
|                                                   | hsa-miR-125a-5p            |                             |
|                                                   | hsa-miR-221-5p             |                             |
|                                                   | hsa-miR-221-3p             |                             |

**Table S3.** The growth rate of tumours and MCP-1/CCL2 levels in plasma of mice injected s.c. with of control HT29-pcDNA or HT29-Snail cells followed by i.v. injections of various EVs.

| Cell injection<br>Day 0 | EV Injection<br>Day 8, 12, 15, 18 | Growth of Tumour<br>Rate/Slope<br>Day 12–28 | MCP-1 in Plasma<br>ng/mL<br>Day 28 |
|-------------------------|-----------------------------------|---------------------------------------------|------------------------------------|
| HT29-pcDNA              | None                              | 0.055 + 0.003                               | 28.4 + 4.6                         |
| HT29-pcDNA              | HT29-pcDNA                        | 0.048 + 0.007                               | 21.3 + 2.2                         |
| HT29-Snail17            | None                              | 0.044 + 0.004                               | 39.2 + 7.2                         |

|              |              |                   |                |
|--------------|--------------|-------------------|----------------|
| HT29-Snail17 | HT29-pcDNA   | $0.034 \pm 0.008$ | $43.8 \pm 4.8$ |
| HT29-Snail17 | HT29-Snail17 | $0.040 \pm 0.003$ | $30.3 \pm 5.1$ |
